# Supplementary material
Source: PubMed Central journal article supplement (PMC3122237)
Supplement: supp_M111.234914_jbc.M111.234914-1.pdf [file supp_M111.234914_jbc.M111.234914-1.pdf]

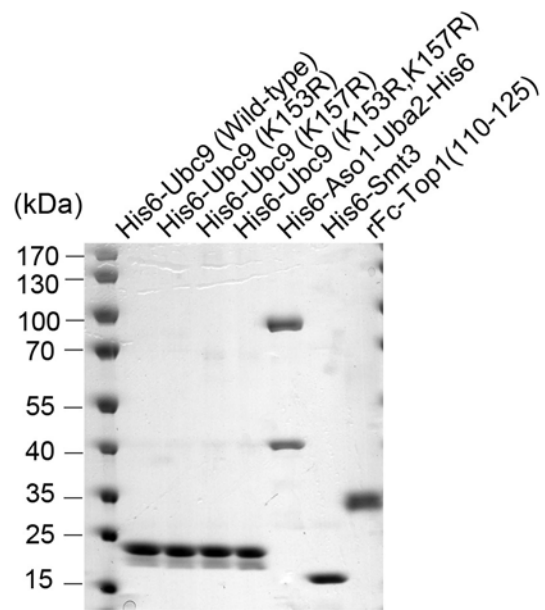

**Figure S1.** Purified recombinant proteins used for *in vitro* sumoylation assay on a 4-12% SDS-polyacrylamide gel stained with Coomassie Brilliant Blue. About 3  $\mu\text{g}$  of each sample indicated above each lane was used.
