# Supplementary material
Source: PubMed Central journal article supplement (PMC3122237)
Supplement: supp_M111.234914_jbc.M111.234914-3.pdf [file supp_M111.234914_jbc.M111.234914-3.pdf]

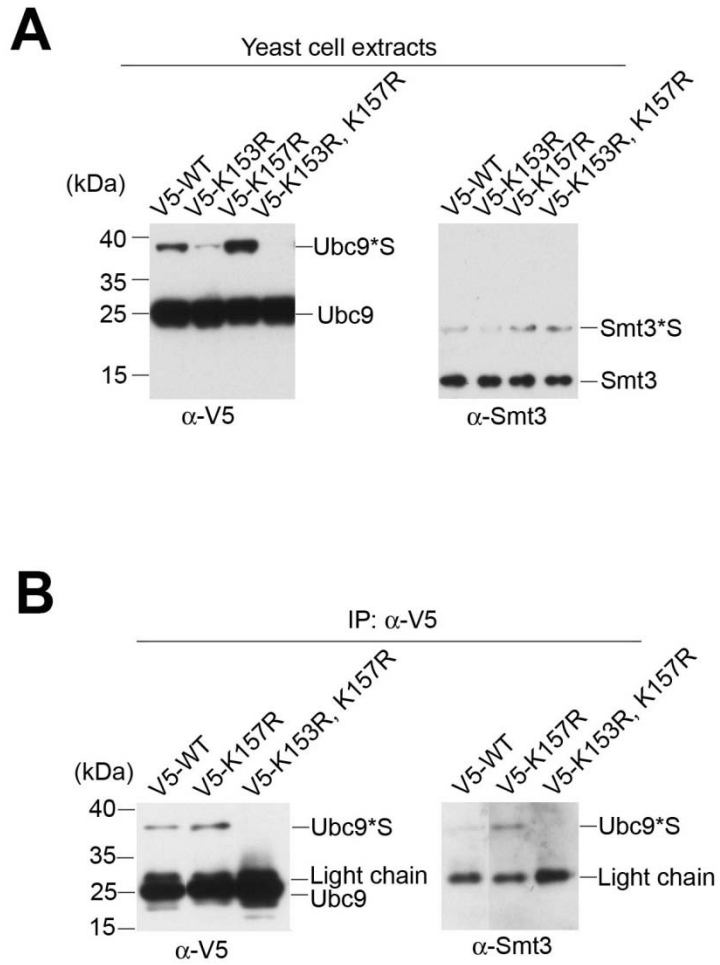

**Figure S3.** (A) Whole cell lysates from cells expressing V5-tagged *UBC9* (wild-type) and indicated V5-tagged *ubc9* variants were subjected to immunoblotting using anti-V5 and anti-Smt3 antibodies. (B) Whole cell lysates from (A) were immunoprecipitated with anti-V5-agarose affinity gel and subjected to immunoblotting using anti-V5 and anti-Smt3 antibodies.
