# Supplementary material
Source: PubMed Central journal article supplement (PMC3122237)
Supplement: supp_M111.234914_jbc.M111.234914-6.pdf [file supp_M111.234914_jbc.M111.234914-6.pdf]

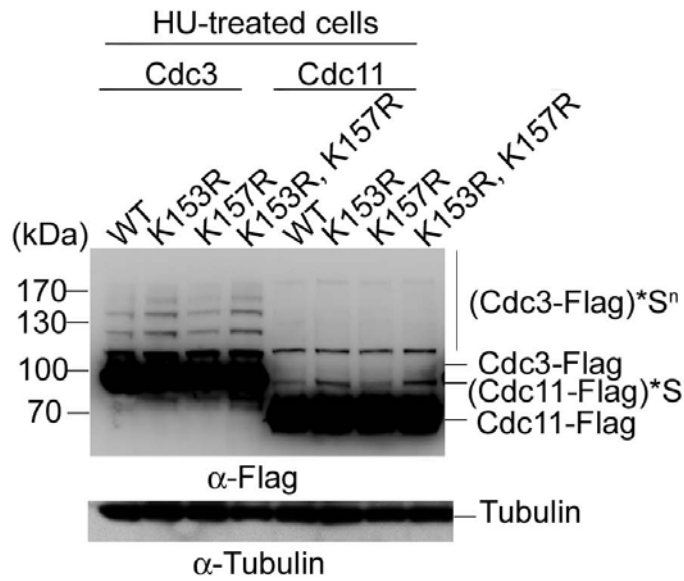

**Figure S6.** Sumoylation levels of septin components Cdc3 and Cdc11 *in vivo*. Strains contain either C-terminally Flag-tagged *CDC3* or *CDC11* for immunoblotting detection. Whole cell extracts from cells arrested in S phase by Hydroxyurea treatment were applied to analysis by SDS-PAGE, followed by immunoblotting with anti-Flag antibody to detect sumoylation of Cdc3 and Cdc11 (upper panel). Tubulin was also probed by anti-tubulin antibody as the loading control (lower panel).
