# Supplementary material
Source: PubMed Central journal article supplement (PMC3122237)
Supplement: supp_M111.234914_jbc.M111.234914-7.pdf [file supp_M111.234914_jbc.M111.234914-7.pdf]

**Table S1** Yeast Strains

| Strain  | Relevant genotype                                                                                                                                                                                        | Reference                           |
|---------|----------------------------------------------------------------------------------------------------------------------------------------------------------------------------------------------------------|-------------------------------------|
| BY4705  | <i>MAT<math>\alpha</math></i> , <i>ade2 ::hisG</i> , <i>his3</i> $\Delta$ 200,<br><i>leu2</i> $\Delta$ 0, <i>lys2</i> $\Delta$ 0, <i>met15</i> $\Delta$ , <i>trp</i> $\Delta$ 63, <i>ura3</i> $\Delta$ 0 | (Brachmann <i>et al.</i> ,<br>1998) |
| CWH001  | <i>MAT<math>\alpha</math> ubc9<math>\Delta</math>::HphMX</i> pRS416- <i>UBC9</i> <sup>WT</sup>                                                                                                           | This study                          |
| CWH002  | <i>MAT<math>\alpha</math> ubc9<math>\Delta</math>::HphMX</i> pRS415- <i>UBC9</i> <sup>WT</sup>                                                                                                           | This study                          |
| CWH003  | <i>MAT<math>\alpha</math> ubc9<math>\Delta</math>::HphMX</i> pRS415- <i>ubc9</i> <sup>K153R</sup>                                                                                                        | This study                          |
| CWH004  | <i>MAT<math>\alpha</math> ubc9<math>\Delta</math>::HphMX</i> pRS415- <i>ubc9</i> <sup>K157R</sup>                                                                                                        | This study                          |
| CWH005  | <i>MAT<math>\alpha</math> ubc9<math>\Delta</math>::HphMX</i> pRS415- <i>ubc9</i> <sup>K153, K157R</sup>                                                                                                  | This study                          |
| CWH006  | <i>MAT<math>\alpha</math> ubc9<math>\Delta</math>::HphMX</i> <i>CDC3-Flag3His6::KanMX</i><br>pRS416- <i>UBC9</i> <sup>WT</sup>                                                                           | This study                          |
| CWH007  | <i>MAT<math>\alpha</math> ubc9<math>\Delta</math>::HphMX</i> <i>CDC3-Flag3His6::KanMX</i><br>pRS415- <i>UBC9</i> <sup>WT</sup>                                                                           | This study                          |
| CWH008  | <i>MAT<math>\alpha</math> ubc9<math>\Delta</math>::HphMX</i> <i>CDC3-Flag3His6::KanMX</i><br>pRS415- <i>ubc9</i> <sup>K153R</sup>                                                                        | This study                          |
| CWH009  | <i>MAT<math>\alpha</math> ubc9<math>\Delta</math>::HphMX</i> <i>CDC3-Flag3His6::KanMX</i><br>pRS415- <i>ubc9</i> <sup>K157R</sup>                                                                        | This study                          |
| CWH0010 | <i>MAT<math>\alpha</math> ubc9<math>\Delta</math>::HphMX</i> <i>CDC3-Flag3His6::KanMX</i><br>pRS415- <i>ubc9</i> <sup>K153, K157R</sup>                                                                  | This study                          |
| CWH0011 | <i>MAT<math>\alpha</math> ubc9<math>\Delta</math>::HphMX</i> <i>CDC11-Flag3His6::KanMX</i><br>pRS416- <i>UBC9</i> <sup>WT</sup>                                                                          | This study                          |
| CWH0012 | <i>MAT<math>\alpha</math> ubc9<math>\Delta</math>::HphMX</i> <i>CDC11-Flag3His6::KanMX</i><br>pRS415- <i>UBC9</i> <sup>WT</sup>                                                                          | This study                          |
| CWH0013 | <i>MAT<math>\alpha</math> ubc9<math>\Delta</math>::HphMX</i> <i>CDC11-Flag3His6::KanMX</i><br>pRS415- <i>ubc9</i> <sup>K153R</sup>                                                                       | This study                          |
| CWH0014 | <i>MAT<math>\alpha</math> ubc9<math>\Delta</math>::HphMX</i> <i>CDC11-Flag3His6::KanMX</i><br>pRS415- <i>ubc9</i> <sup>K157R</sup>                                                                       | This study                          |
| CWH0015 | <i>MAT<math>\alpha</math> ubc9<math>\Delta</math>::HphMX</i> <i>CDC11-Flag3His6::KanMX</i><br>pRS415- <i>ubc9</i> <sup>K153, K157R</sup>                                                                 | This study                          |
| CWH0016 | <i>MAT<math>\alpha</math> ubc9<math>\Delta</math>::HphMX</i> <i>siz1<math>\Delta</math>::KanMX</i> pRS416- <i>UBC9</i> <sup>WT</sup>                                                                     | This study                          |
| CWH0017 | <i>MAT<math>\alpha</math> ubc9<math>\Delta</math>::HphMX</i> <i>siz2<math>\Delta</math>::HIS</i> pRS416- <i>UBC9</i> <sup>WT</sup>                                                                       | This study                          |
| CWH0018 | <i>MAT<math>\alpha</math> ubc9<math>\Delta</math>::HphMX</i> <i>siz1<math>\Delta</math>::KanMX</i> <i>siz2<math>\Delta</math>::HIS</i><br>pRS416- <i>UBC9</i> <sup>WT</sup>                              | This study                          |
| CWH0019 | <i>MAT<math>\alpha</math> ubc9<math>\Delta</math>::HphMX</i> pRS415-V5- <i>UBC9</i> <sup>WT</sup>                                                                                                        | This study                          |
| CWH0020 | <i>MAT<math>\alpha</math> ubc9<math>\Delta</math>::HphMX</i> pRS415-V5- <i>ubc9</i> <sup>K153R</sup>                                                                                                     | This study                          |
| CWH0021 | <i>MAT<math>\alpha</math> ubc9<math>\Delta</math>::HphMX</i> pRS415-V5- <i>ubc9</i> <sup>K157R</sup>                                                                                                     | This study                          |
| CWH0022 | <i>MAT<math>\alpha</math> ubc9<math>\Delta</math>::HphMX</i> pRS415-V- <i>ubc9</i> <sup>K153, K157R</sup>                                                                                                | This study                          |
